# Supplementary material for: The long-term effects of COVID-19 on pulmonary status and quality of life
Source: PeerJ. 2023 Dec 21;11:e16694. doi: 10.7717/peerj.16694 (PMC10749089; doi:10.7717/peerj.16694)
Supplement: Supplemental Information 1 — The number of participants with their PFT values, 6MWT components, and SF 36 questionnaire domains, and the comparison of non-COVID and post COVID regarding the SF-36 domains. [file peerj-11-16694-s001.xlsx]

## Sheet: DATA
case/control	Age	Gender	Height (cm)	Weight (Kg)	HT (M)	height in m2	BMI	Symptoms	Past medical History	Hospital admission	ICU admission	Oxygen required	Mechanical ventilation required	FVC Pred	FVC Best	FVC (B/P)%	FEV1Pred	FEV1 Best	FEV1 (B/P%)	FEV1/FVC Pred	FEV1/FVCBest	FEV1/FVC %(B/P)	DLCO Pred	DLCO Best	DLCO(B/P%)	Distance	Fatigue	6-MWT Dyspnea	Physical functioning case	Role limitation due to physical health case	Role limitations due to emotional problems	Energy Fatigue	Emotional well-being	Social functioning	Pain	General health	Health Change
1	22	1	168	52	1.68	2.8224	18.424	0	0	0	0	1	1	4.71	4.53	96	4.03	3.76	93	83	83	100	29.58	21.31	72.0419	553	0	0	90	75	100	90	80	88	90	60	50
1	22	2	152	48	1.52	2.3104	20.7756	0	0	0	0	1	1	3.19	3.14	98	2.77	2.48	89	84	97	94	20.99	13.38	63.7446	543	1	1	90	100	100	40	64	50	88	75	50
1	23	2	155	60	1.55	2.4025	24.974	0	0	0	0	1	1	3.32	3.92	118	2.9	3.15	109	84	80	95	21.66	18.15	83.795	552	0.5	1	95	100	100	60	64	75	78	60	50
1	23	2	165	63	1.65	2.7225	23.1405	0	0	0	0	1	1	3.76	4.05	108	3.29	3.6	109	84	89	105	23.85	37.75	158.281	610	0	0	80	100	100	75	84	88	100	90	50
1	28	2	157	53	1.57	2.4649	21.5019	0	1	0	0	1	1	3.34	3.25	97	2.9	3	103	84	92	110	21.77	17.6	80.8452	524	0.5	0	95	100	100	80	96	88	100	95	50
1	23	2	160	75	1.6	2.56	29.2969	0	0	0	0	2	1	3.44	4.03	117	3	3.34	112	84	83	98	22.22	16.92	76.1476	400	1	0.5	85	100	100	60	28	38	78	60	100
1	29	2	153	101	1.53	2.3409	43.1458	0	0	0	0	1	1	3.11	2.69	87	2.69	2.29	85	84	85	102	20.7	16.06	77.5845	490	4	5	25	50	100	60	52	50	78	90	100
1	22	2	156	51	1.56	2.4336	20.9566	0	0	2	1	1	1	3.32	3.65	110	2.9	3.16	109	84	87	103	21.66	17.21	79.4552	410	1	1	80	75	33	35	56	88	88	60	75
1	26	1	180	72	1.8	3.24	22.2222	0	1	2	1	1	1	5.37	5.12	95	4.52	4.11	91	83	80	97	32.1	22.9	71.3396	500	3	2	100	100	100	65	44	88	100	70	50
1	56	2	163	95	1.63	2.6569	35.756	0	0	2	1	1	1	2.88	2.13	74	2.45	1.58	65	79	74	94	21.47	28.3	131.812	470	0	2	80	25	33	65	52	75	100	60	100
1	21	2	170	68	1.7	2.89	23.5294	0	0	2	1	1	1	4.11	4.38	107	3.6	3.9	108	84	89	106	25.71	24.92	96.9273	520	4	7	30	0	0	10	32	75	88	85	75
1	30	2	166	47	1.66	2.7556	17.0562	0	0	1	2	1	1	3.64	3.11	85	3.17	3.05	96	83	91	109	23.45	27.78	118.465	540	3	2	15	75	0	55	48	75	78	70	75
1	20	2	159	60	1.59	2.5281	23.7332	0	0	1	1	1	1	3.49	3.17	90	3.05	2.68	88	84	85	100	22.62	13.21	58.3996	418	2	3	100	100	0	70	72	38	78	75	50
1	49	2	165	78	1.65	2.7225	28.6501	0	0	1	2	1	1	3.16	2.83	89	2.71	2.16	80	80	74	93	22.37	9.78	43.7193	405	2	5	35	75	100	50	56	63	90	50	50
1	29	1	175	87	1.75	3.0625	28.4082	0	0	2	1	1	1	4.97	4.99	100	4.18	3.33	80	82	67	81	30.22	19.94	65.9828	530	0	0	40	75	33	60	76	38	78	90	50
1	52	1	178	104	1.78	3.1684	32.8241	1900-01-03	0	2	1	1	1	4.6	5.39	117	3.71	3.87	105	78	72	92	28.1	24.25	86.2989	594	6	6	80	75	33	40	20	88	90	45	25
1	34	2	162	82	1.62	2.6244	31.2452	1900-01-01	0	2	1	1	1	4.52	4.4	97	3.72	3.49	94	80	79	100	26.21	20.25	77.2606	390	0	5	65	75	100	45	28	50	35	65	50
1	41	1	161	63	1.61	2.5921	24.3046	0	0	2	1	1	1	3.68	4.97	135	3.06	4.03	132	79	79	100	19.65	15.24	77.5573	572	0.5	0.5	100	50	33	60	68	75	35	75	50
1	59	1	178	97	1.78	3.1684	30.6148	0	0	1	2	2	1	4.37	4.63	106	3.44	3.5	102	77	75	99	26.35	20.56	78.0266	396	3	3	70	100	33	50	56	75	43	65	50
2	22	1	170	50	1.7	2.89	17.301	0	0					4.8	5.72	119	4.09	4.87	119	83	85	103	21.25	21.05	99.0588	687	0	1	90	100	67	60	36	25	90	100	50
2	22	2	158	45	1.58	2.4964	18.026	5	0					3.46	2.84	82	3.02	2.72	90	84	94	111	22.39	22.32	99.6874	480	0	0	90	0	33	55	84	75	55	95	100
2	21	2	161	64	1.61	2.5921	24.6904	0	0					3.58	4.17	116	3.13	3.44	110	84	83	98	19.66	18.92	96.236	553	2	0.5	95	0	67	65	80	100	78	85	50
2	22	2	167	58	1.67	2.7889	20.7967	0	0					3.85	3.73	97	3.37	3.11	92	84	83	99	22.21	21.57	97.1184	510	2	0.5	100	100	100	80	88	100	100	100	50
2	25	2	162	50	1.62	2.6244	19.052	0	0					3.65	3.16	87	3.19	3.04	95	84	96	114	23.22	45.19	194.617	480	1	1	100	25	100	45	36	63	88	70	75
2	26	2	157	80	1.57	2.4649	32.4557	0	0					3.41	2.83	83	2.98	2.39	80	84	84	100	21.22	23.21	109.378	482	0.5	0.5	100	100	100	80	80	88	100	75	100
2	28	2	159	96	1.59	2.5281	37.9732	0	0					3.36	4.31	128	2.92	3.83	131	84	89	106	19.77	18.56	93.8796	480	0.5	1	100	75	67	80	92	63	100	70	50
2	21	2	153	47	1.53	2.3409	20.0777	0	0					3.23	3.07	95	2.81	2.72	97	84	87	103	18.96	19.01	100.264	531	1	0	80	100	100	60	68	38	43	75	100
2	25	1	176	78	1.76	3.0976	25.1808	0	0					4.67	5.22	112	3.99	3.69	92	83	71	85	20.01	21.56	107.746	660	2	0	100	100	0	80	52	75	100	95	50
2	52	2	160	90	1.6	2.56	35.1562	0	0					2.84	2.62	92	2.41	2.04	85	79	77	97	21.02	13.88	66.0324	485	0	0	100	100	100	80	92	100	100	80	50
2	21	2	163	66.5	1.63	2.6569	25.0292	0	0					3.68	4.09	111	3.21	3.55	110	84	86	102	23.56	25.83	109.635	560	0.5	0.5	95	75	67	75	68	88	100	100	100
2	32	2	160	50	1.6	2.56	19.5312	0	0					3.36	3.47	103	2.91	3.04	104	83	87	105	22.16	30.24	136.462	538	0	0	100	100	100	65	72	88	90	100	50
2	19	2	155	69	1.55	2.4025	28.7201	0	0					3.32	3.68	111	2.9	3.44	119	84	93	111	21.78	22.38	102.755	450	2	1	100	100	0	60	64	63	100	85	75
2	50	2	164	69	1.64	2.6896	25.6544	0	0					3.04	4.18	137	2.6	2.99	115	79	71	90	21.97	13.46	61.2654	520	0	0	85	100	100	70	88	88	68	75	50
2	31	1	172	82	1.72	2.9584	27.7177	0	0					4.66	4.2	90	3.93	2.92	74	82	68	83	22.37	9.78	43.7193	522	0	0.5	95	100	100	65	56	75	90	50	25
2	49	1	178	110	1.78	3.1684	34.7178	0	0					4.84	4.84	100	3.97	4.37	110	80	90	113	19.45	19.01	97.7378	532	2	2	75	100	100	60	64	62	77	65	75
2	36	1	159	84	1.59	2.5281	33.2265	0	0					3.1	3.56	115	2.67	3.07	115	82	84	102	22.78	21.22	93.1519	430	4	6	80	50	33	50	64	87	55	80	50
2	44	1	160	60	1.6	2.56	23.4375	0	0					3.1	3.85	124	2.66	3.01	113	81	77	95	20.65	18.05	87.4092	590	0.5	0.5	100	100	100	60	28	88	100	55	50
2	57	1	176	100	1.76	3.0976	32.2831	0	0					4.27	4.69	110	3.39	3.56	105	77	76	98	22.31	19.25	86.2842	454	0	0	75	100	100	60	76	100	90	90	50
2	28	1					20.78	0	0					2.84	2.62	92	2.98	2.39	80	84	83	99	20.65	18.05	87.4092	485	0	0	80	100	100	70	88	100	100	100	100

## Sheet: Sheet1
	Post COVID 19	Control
Physical functioning	90	75
Role limitation physical	67.11	84.5
Role limitation emotional	76.32	81.25
Energy fatigue	52.62	76.67
Emotional well being	56.31	66
Social functioning	56	68.88
Pain	68.42	78.07
General Health	79.47	86.1
Health change	60.53	65

## Sheet: Sheet2
Hospital admission	ICU admission	Age case	Gender case	Height (cm)	Weight (Kg)	HT (M)	height in m2	BMI case	Symptoms case	Past medical History case	Oxygen required	Mechanical ventilation required	FVC case			FEV1 case			FEV1/FVC case			DLCO case			6-MWT case			SF-36
													Pred	Best	(Best/Pred)%	Pred	Best	(B/P%)	Pred	Best	%(B/P)	Pred	Best	(B/P%)	Distance	Fatigue	Dyspnea	Physical functioning case		Role limitation due to physical health case	Role limitations due to emotional problems case	Energy Fatigue case	Emotional well-being case	Social functioning case	Pain case	General health case	Health Change case
2	1	22	2	156	51	1.56	2.4336	20.9566	0	0	1	1	3.32	3.65	110	2.9	3.16	109	84	87	103	21.66	17.21	79.4552	410	1	1	0	0.8	0.75	0.333	0.35	0.56	0.875	0.875	0.6	0.75
2	1	26	1	180	72	1.8	3.24	22.2222	0	1	1	1	5.37	5.12	95	4.52	4.11	91	83	80	97	32.1	22.9	71.3396	500	3	2	1	1	1	1	0.65	0.44	0.875	1	0.7	0.5
2	1	56	2	163	95	1.63	2.6569	35.756	0	0	1	1	2.88	2.13	74	2.45	1.58	65	79	74	94	21.47	28.3	131.812	470	0	2	0.8	0.25	0.25	0.333	0.65	0.52	0.75	1	0.6	1
2	1	21	2	170	68	1.7	2.89	23.5294	0	0	1	1	4.11	4.38	107	3.6	3.9	108	84	89	106	25.71	24.92	96.9273	520	4	7	0.3	0.95	0	0	0.1	0.32	0.75	0.875	0.85	0.75
1	2	30	2	166	47	1.66	2.7556	17.0562	0	0	1	1	3.64	3.11	85	3.17	3.05	96	83	91	109	23.45	27.78	118.465	540	3	2	0.15	1	0.75	0	0.55	0.48	0.75	0.775	0.7	0.75
2	1	20	2	159	60	1.59	2.5281	23.7332	0	0	1	1	3.49	3.17	90	3.05	2.68	88	84	85	100	22.62	13.21	58.3996	418	2	3	1	1	1	0	0.7	0.72	0.375	0.775	0.75	0.5
1	2	49	2	165	78	1.65	2.7225	28.6501	0	0	1	1	3.16	2.83	89	2.71	2.16	80	80	74	93	22.37	9.78	43.7193	405	2	5	0.35	0.85	0.75	1	0.5	0.56	0.625	0.9	0.5	0.5
2	1	29	1	175	87	1.75	3.0625	28.4082	0	0	1	1	4.97	4.99	100	4.18	3.33	80	82	67	81	30.22	19.94	65.9828	530	0	0	0.4	0.95	0.75	0.333	0.6	0.76	0.375	0.775	0.9	0.5
2	1	52	1	178	104	1.78	3.1684	32.8241	1900-01-03	0	1	1	4.6	5.39	117	3.71	3.87	105	78	72	92	28.1	24.25	86.2989	594	6	6	0.8	0.75	0.75	0.333	0.4	0.2	0.875	0.9	0.45	0.25
2	1	34	2	162	82	1.62	2.6244	31.2452	1900-01-01	0	1	1	4.52	4.4	97	3.72	3.49	94	80	79	100	26.21	20.25	77.2606	390	0	5	0.65	0.8	0.75	1	0.45	0.28	0.5	0.35	0.65	0.5
2	1	41	1	161	63	1.61	2.5921	24.3046	0	0	1	1	3.68	4.97	135	3.06	4.03	132	79	79	100	19.65	15.24	77.5573	572	0.5	0.5	1	1	0.5	0.333	0.6	0.68	0.75	0.35	0.75	0.5
1	2	59	1	178	97	1.78	3.1684	30.6148	0	0	2	1	4.37	4.63	106	3.44	3.5	102	77	75	99	26.35	20.56	78.0266	396	3	3	0.7	0.75	1	0.333	0.5	0.56	0.75	0.425	0.65	0.5

## Sheet: Sheet3
case/control	Age	Gender	Height (cm)	Weight (Kg)	HT (M)	height in m2	BMI	Symptoms	Past medical History	Hospital admission	ICU admission	Oxygen required	Mechanical ventilation required	FVC Pred	FVC Best	FVC (B/P)%	FEV1Pred	FEV1 Best	FEV1 (B/P%)	FEV1/FVC Pred	FEV1/FVCBest	FEV1/FVC %(B/P)	DLCO Pred	DLCO Best	DLCO(B/P%)	Distance	Fatigue	6-MWT Dyspnea	Physical functioning case	Role limitation due to physical health case	Role limitations due to emotional problems	Energy Fatigue	Emotional well-being	Social functioning	Pain	General health	Health Change
1	22	1	168	52	1.68	2.8224	18.424	0	0	0	0	1	1	4.71	4.53	96	4.03	3.76	93	83	83	100	29.58	21.31	72.0419	553	0	0	90	75	100	90	80	88	90	60	50
1	22	2	152	48	1.52	2.3104	20.7756	0	0	0	0	1	1	3.19	3.14	98	2.77	2.48	89	84	97	94	20.99	13.38	63.7446	543	1	1	90	100	100	40	64	50	88	75	500
1	23	2	155	60	1.55	2.4025	24.974	0	0	0	0	1	1	3.32	3.92	118	2.9	3.15	109	84	80	95	21.66	18.15	83.795	552	0.5	1	95	100	100	60	64	75	78	60	50
1	23	2	165	63	1.65	2.7225	23.1405	0	0	0	0	1	1	3.76	4.05	108	3.29	3.6	109	84	89	105	23.85	37.75	158.281	610	0	0	80	100	100	75	84	88	100	90	50
1	28	2	157	53	1.57	2.4649	21.5019	0	1	0	0	1	1	3.34	3.25	97	2.9	3	103	84	92	110	21.77	17.6	80.8452	524	0.5	0	95	100	100	80	96	88	100	95	50
1	23	2	160	75	1.6	2.56	29.2969	0	0	0	0	2	1	3.44	4.03	117	3	3.34	112	84	83	98	22.22	16.92	76.1476	400	1	0.5	85	100	100	60	28	38	78	60	100
1	29	2	153	101	1.53	2.3409	43.1458	0	0	0	0	1	1	3.11	2.69	87	2.69	2.29	85	84	85	102	20.7	16.06	77.5845	490	4	5	25	50	100	60	52	50	78	90	100
													MEAN	3.55286	3.65857	103	3.08286	3.08857	100	83.8571	87	100.571	22.9671	20.1671	87.4914	524.571	1	1.07143
													sd	0.551051	0.644578	11.6333	0.459337	0.547005	10.8781	0.377964	5.97216	5.65264	3.08918	8.10966	31.8811	65.7162	1.38444	1.78952
case/control	Age	Gender	Height (cm)	Weight (Kg)	HT (M)	height in m2	BMI	Symptoms	Past medical History	Hospital admission	ICU admission	Oxygen required	Mechanical ventilation required	FVC Pred	FVC Best	FVC (B/P)%	FEV1Pred	FEV1 Best	FEV1 (B/P%)	FEV1/FVC Pred	FEV1/FVCBest	FEV1/FVC %(B/P)	DLCO Pred	DLCO Best	DLCO(B/P%)	Distance	Fatigue	6-MWT Dyspnea	Physical functioning case	Role limitation due to physical health case	Role limitations due to emotional problems	Energy Fatigue	Emotional well-being	Social functioning	Pain	General health	Health Change
1	22	2	156	51	1.56	2.4336	20.9566	0	0	2	1	1	1	3.32	3.65	110	2.9	3.16	109	84	87	103	21.66	17.21	79.4552	410	1	1	80	75	33	35	56	88	88	60	75
1	26	1	180	72	1.8	3.24	22.2222	0	1	2	1	1	1	5.37	5.12	95	4.52	4.11	91	83	80	97	32.1	22.9	71.3396	500	3	2	100	100	100	65	44	88	100	70	50
1	56	2	163	95	1.63	2.6569	35.756	0	0	2	1	1	1	2.88	2.13	74	2.45	1.58	65	79	74	94	21.47	28.3	131.812	470	0	2	80	25	33	65	52	75	100	60	100
1	21	2	170	68	1.7	2.89	23.5294	0	0	2	1	1	1	4.11	4.38	107	3.6	3.9	108	84	89	106	25.71	24.92	96.9273	520	4	7	30	0	0	10	32	75	88	85	75
1	29	1	175	87	1.75	3.0625	28.4082	0	0	2	1	1	1	4.97	4.99	100	4.18	3.33	80	82	67	81	30.22	19.94	65.9828	530	0	0	40	75	33	60	76	38	78	90	50
1	52	1	178	104	1.78	3.1684	32.8241	1900-01-03	0	2	1	1	1	4.6	5.39	117	3.71	3.87	105	78	72	92	28.1	24.25	86.2989	594	6	6	80	75	33	40	20	88	90	45	25
1	34	2	162	82	1.62	2.6244	31.2452	1900-01-01	0	2	1	1	1	4.52	4.4	97	3.72	3.49	94	80	79	100	26.21	20.25	77.2606	390	0	5	65	75	100	45	28	50	35	65	50
1	41	1	161	63	1.61	2.5921	24.3046	0	0	2	1	1	1	3.68	4.97	135	3.06	4.03	132	79	79	100	19.65	15.24	77.5573	572	0.5	0.5	100	50	33	60	68	75	35	75	50
													Mean	4.18125	4.37875	104.375	3.5175	3.43375	98	81.125	78.375	96.625	25.64	21.6262	85.8292	498.25	1.8125	2.9375	71.875
													sd	0.846563	1.06125	17.808	0.682323	0.823389	20.368	2.41646	7.36667	7.78162	4.44327	4.29151	20.7849	72.1066	2.2668	2.67845	25.6261
case/control	Age	Gender	Height (cm)	Weight (Kg)	HT (M)	height in m2	BMI	Symptoms	Past medical History	Hospital admission	ICU admission	Oxygen required	Mechanical ventilation required	FVC Pred	FVC Best	FVC (B/P)%	FEV1Pred	FEV1 Best	FEV1 (B/P%)	FEV1/FVC Pred	FEV1/FVCBest	FEV1/FVC %(B/P)	DLCO Pred	DLCO Best	DLCO(B/P%)	Distance	Fatigue	6-MWT Dyspnea	Physical functioning case	Role limitation due to physical health case	Role limitations due to emotional problems	Energy Fatigue	Emotional well-being	Social functioning	Pain	General health	Health Change
1	30	2	166	47	1.66	2.7556	17.0562	0	0	1	2	1	1	3.64	3.11	85	3.17	3.05	96	83	91	109	23.45	27.78	118.465	540	3	2	15	75	0	55	48	75	78	70	75
1	20	2	159	60	1.59	2.5281	23.7332	0	0	1	1	1	1	3.49	3.17	90	3.05	2.68	88	84	85	100	22.62	13.21	58.3996	418	2	3	100	100	0	70	72	38	78	75	50
1	49	2	165	78	1.65	2.7225	28.6501	0	0	1	2	1	1	3.16	2.83	89	2.71	2.16	80	80	74	93	22.37	9.78	43.7193	405	2	5	35	75	100	50	56	63	90	50	50
1	59	1	178	97	1.78	3.1684	30.6148	0	0	1	2	2	1	4.37	4.63	106	3.44	3.5	102	77	75	99	26.35	20.56	78.0266	396	3	3	70	100	33	50	56	75	43	65	50
													Mean	3.665	3.435	92.5	3.0925	2.8475	91.5	81	81.25	100.25	23.6975	17.8325	74.6526	439.75	2.5	3.25	55
													sd	0.510979	0.810329	9.25563	0.302696	0.567883	9.57427	3.16228	8.18026	6.60177	1.82759	8.01254	32.4136	67.4407	0.57735	1.25831	37.6386
