# Supplementary material for: The long-term effects of COVID-19 on pulmonary status and quality of life
Source: PeerJ. 2023 Dec 21;11:e16694. doi: 10.7717/peerj.16694 (PMC10749089; doi:10.7717/peerj.16694)
Supplement: Supplemental Information 2 [file peerj-11-16694-s002.xlsx]

## Sheet: COVID-19 lung function
partcipantID	casecontrol	Age	Gender	Heightcm	WeightKg	BMI	Symptoms	Hospitaladmission	FVCBest	FVCBP	FEV1Best	FEV1BP	FEV1FVCBest	FEV1FVCBP	DLCOBest	DLCOBP	Distance	Fatigue	@6MWTDyspnea	Physicalfunctioningcase	Rolelimitationduetophysicalhealthcase	Rolelimitationsduetoemotionalproblems	EnergyFatigue	Emotionalwellbeing	Socialfunctioning	Pain	Generalhealth	HealthChange	SF_36
1	1	22	1	168	52	18.42403628117914	0	0	4.53	96	3.76	93	83	100	21.31	72.0419	553	0	0	90	75	100	90	80	88	90	60	50	80.3333
2	1	22	2	152	48	20.775623268698062	0	0	3.14	98	2.48	89	97	94	13.38	63.7446	543	1	1	90	100	100	40	64	50	88	75	50	73
3	1	23	2	155	60	24.97398543184183	0	0	3.92	118	3.15	109	80	95	18.15	83.795	552	0.5	1	95	100	100	60	64	75	78	60	50	75.7778
4	1	23	2	165	63	23.140495867768596	0	0	4.05	108	3.6	109	89	105	37.75	158.281	610	0	0	80	100	100	75	84	88	100	90	50	85.2222
5	1	28	2	157	53	21.50188648626719	0	0	3.25	97	3	103	92	110	17.6	80.8452	524	0.5	0	95	100	100	80	96	88	100	95	50	89.3333
6	1	23	2	160	75	29.296874999999993	0	0	4.03	117	3.34	112	83	98	16.92	76.1476	400	1	0.5	85	100	100	60	28	38	78	60	100	72.1111
7	1	29	2	153	101	43.145798624460674	0	0	2.69	87	2.29	85	85	102	16.06	77.5845	490	4	5	25	50	100	60	52	50	78	90	100	67.2222
8	1	22	2	156	51	20.956607495069033	0	0	3.65	110	3.16	109	87	103	17.21	79.4552	410	1	1	80	75	33	35	56	88	88	60	75	65.5556
9	1	26	1	180	72	22.22222222222222	0	0	5.12	95	4.11	91	80	97	22.9	71.3396	500	3	2	100	100	100	65	44	88	100	70	50	79.6667
10	1	56	2	163	95	35.75595618954421	0	0	2.13	74	1.58	65	74	94	28.3	131.812	470	0	2	80	25	33	65	52	75	100	60	100	65.5556
11	1	21	2	170	68	23.529411764705884	0	0	4.38	107	3.9	108	89	106	24.92	96.9273	520	4	7	30	0	0	10	32	75	88	85	75	43.8889
12	1	30	2	166	47	17.056176513282043	0	1	3.11	85	3.05	96	91	109	27.78	118.465	540	3	2	15	75	0	55	48	75	78	70	75	54.5556
13	1	20	2	159	60	23.73323840037973	0	0	3.17	90	2.68	88	85	100	13.21	58.3996	418	2	3	100	100	0	70	72	38	78	75	50	64.7778
14	1	49	2	165	78	28.650137741046834	0	1	2.83	89	2.16	80	74	93	9.78	43.7193	405	2	5	35	75	100	50	56	63	90	50	50	63.2222
15	1	29	1	175	87	28.408163265306122	0	0	4.99	100	3.33	80	67	81	19.94	65.9828	530	0	0	40	75	33	60	76	38	78	90	50	60
16	1	52	1	178	104	32.82413836636788	3	0	5.39	117	3.87	105	72	92	24.25	86.2989	594	6	6	80	75	33	40	20	88	90	45	25	55.1111
17	1	34	2	162	82	31.24523700655387	1	0	4.4	97	3.49	94	79	100	20.25	77.2606	390	0	5	65	75	100	45	28	50	35	65	50	57
18	1	41	1	161	63	24.3046178773967	0	0	4.97	135	4.03	132	79	100	15.24	77.5573	572	0.5	0.5	100	50	33	60	68	75	35	75	50	60.6667
19	1	59	1	178	97	30.614821360939274	0	1	4.63	106	3.5	102	75	99	20.56	78.0266	396	3	3	70	100	33	50	56	75	43	65	50	60.2222
20	2	22	1	170	50	17.301038062283737	0	0	5.72	119	4.87	119	85	103	21.05	99.0588	687	0	1	90	100	67	60	36	25	90	100	50	68.6667
21	2	22	2	158	45	18.02595737862522	5	0	2.84	82	2.72	90	94	111	22.32	99.6874	480	0	0	90	0	33	55	84	75	55	95	100	65.2222
22	2	21	2	161	64	24.690405462752206	0	0	4.17	116	3.44	110	83	98	18.92	96.236	553	2	0.5	95	0	67	65	80	100	78	85	50	68.8889
23	2	22	2	167	58	20.796729893506402	0	0	3.73	97	3.11	92	83	99	21.57	97.1184	510	2	0.5	100	100	100	80	88	100	100	100	50	90.8889
24	2	25	2	162	50	19.05197378448407	0	0	3.16	87	3.04	95	96	114	45.19	194.617	480	1	1	100	25	100	45	36	63	88	70	75	66.8889
25	2	26	2	157	80	32.45567771512029	0	0	2.83	83	2.39	80	84	100	23.21	109.378	482	0.5	0.5	100	100	100	80	80	88	100	75	100	91.4444
26	2	28	2	159	96	37.97318144060757	0	0	4.31	128	3.83	131	89	106	18.56	93.8796	480	0.5	1	100	75	67	80	92	63	100	70	50	77.4444
27	2	21	2	153	47	20.07774787474903	0	0	3.07	95	2.72	97	87	103	19.01	100.264	531	1	0	80	100	100	60	68	38	43	75	100	73.7778
28	2	25	1	176	78	25.180785123966942	0	0	5.22	112	3.69	92	71	85	21.56	107.746	660	2	0	100	100	0	80	52	75	100	95	50	72.4444
29	2	52	2	160	90	35.15624999999999	0	0	2.62	92	2.04	85	77	97	13.88	66.0324	485	0	0	100	100	100	80	92	100	100	80	50	89.1111
30	2	21	2	163	66.5	25.029169332680947	0	0	4.09	111	3.55	110	86	102	25.83	109.635	560	0.5	0.5	95	75	67	75	68	88	100	100	100	85.3333
31	2	32	2	160	50	19.531249999999996	0	0	3.47	103	3.04	104	87	105	30.24	136.462	538	0	0	100	100	100	65	72	88	90	100	50	85
32	2	19	2	155	69	28.720083246618103	0	0	3.68	111	3.44	119	93	111	22.38	102.755	450	2	1	100	100	0	60	64	63	100	85	75	71.8889
33	2	50	2	164	69	25.654372397382513	0	0	4.18	137	2.99	115	71	90	13.46	61.2654	520	0	0	85	100	100	70	88	88	68	75	50	80.4444
34	2	31	1	172	82	27.717685235262305	0	0	4.2	90	2.92	74	68	83	9.78	43.7193	522	0	0.5	95	100	100	65	56	75	90	50	25	72.8889
35	2	49	1	178	110	34.71783865673526	0	0	4.84	100	4.37	110	90	113	19.01	97.7378	532	2	2	75	100	100	60	64	62	77	65	75	75.3333
36	2	36	1	159	84	33.22653376053162	0	0	3.56	115	3.07	115	84	102	21.22	93.1519	430	4	6	80	50	33	50	64	87	55	80	50	61
37	2	44	1	160	60	23.437499999999996	0	0	3.85	124	3.01	113	77	95	18.05	87.4092	590	0.5	0.5	100	100	100	60	28	88	100	55	50	75.6667
38	2	57	1	176	100	32.28305785123967	0	0	4.69	110	3.56	105	76	98	19.25	86.2842	454	0	0	75	100	100	60	76	100	90	90	50	82.3333
39	2	28	1	178	72	20.78	0	0	2.62	92	2.39	80	83	99	18.05	87.4092	485	0	0	80	100	100	70	88	100	100	100	100	93.1111

## Sheet: coding
coding
control	2
case	1
gender
male	1
female	2
Symptoms
no symptoms	0
cough,productive	1
difficulty breathing	2
shortness of breath 3
Vomiting	4
Headache	5
more than 2 symptoms	6
Hospital admission
No admission	0
Admission	1
